# Supplementary material
Source: HighWire-hosted journal article supplement (https://bmjopen.bmj.com/content/10/5/e036799)
Supplement: inline-supplementary-material-3 [file inline-supplementary-material-3.pdf]

**Script A: Power calculation**

```

na <- 12
nb <- 12
A <- 0:8
B <- 0:8

#Estimated probabilities of reporting 0,...,8 items in the intervention group (a) and control group (b)
pra <- c(0, 0, 0, 0, 0, 0, 0, 5, 5)
prb <- c(0, 0, 0, 0, 0, 2, 4, 4, 2)

pra <- pra/sum(pra)
prb <- prb/sum(prb)

nboot <- 1000
N <- 1000

#Matrices containing random samples of scores for the two groups
ma <- matrix(sample(A, pr = pra, replace = TRUE, siz = N * na), ncol = N)
mb <- matrix(sample(B, pr = prb, replace = TRUE, siz = N * nb), ncol = N)

#Generation of N confidence intervals
sign1 <- c()
for (i in 1:N) {
  reporting <- data.frame(
    score = c(ma[, i], mb[, i]),
    group = factor(rep(c("Control", "Intervention"), c(na, nb)))
  )
  # Bootstrapping
  diff.mean1 <- c()
  for (k in 1:nboot){
    sel <- sample(1:(na + nb), na + nb, rep = TRUE) # selected articles
    reporting.boot <- reporting[sel, ]
    diff.mean1[k]<- with(reporting.boot, diff(tapply(score, group, mean)))
  }
  conf.int1 <- quantile(diff.mean1, c(0.025, 0.975))
  sign1[i] <- conf.int1[2] < 0 #Checking if the CI crosses 0
}
power <- sum(sign1)/N

```

**Script B: Randomisation of manuscripts (R Shiny application)**

```

#File 1

Sys.setlocale("LC_ALL", "es_ES.UTF-8") #to be sure that accents in text will be allowed in plots

library(shiny)

library(shinyalert)

fluidPage(
  useShinyalert(),
  fluidRow(
    headerPanel('Randomisation of BMJ Open manuscripts'),
    wellPanel(
      textInput("identif", "Please enter the manuscript ID:", width='33%'),
      textAreaInput("titulo", "Please enter the manuscript title, or at least its first words:"),
      selectInput("tipo", "Does it correspond to an extension of CONSORT?", choices=c("", "Yes", "No"), width='33%'),
      actionButton("send", "SUBMIT")
    ),
    p(),
    wellPanel(
      #h3('Data'),
      #p("(just for testing purpose)"),
      #tableOutput("asig"),
      #actionButton("borrar", "RESET")
    )
  )
)

```

```

#File 2

library(shiny)

library(shinyalert)

library(blockrand)

is.void = function(x) {
  if (is.null(x)) return(TRUE)
  x == ""
}

shinyServer(function(input, output, session) {
  upda = reactiveValues(asg=NA)
  archi = "asignacion.dat"

```

```

#File 2 (continuation)

if (file.exists(archi)) {

  upda$asg = read.table(archi, header=TRUE, sep='\t', stringsAsFactors=FALSE)

} else {

  upda$asg = data.frame()

}

set.seed(6374422)

ext <- blockrand(n=100, id.prefix='E', block.prefix='B',stratum='Extension', block.sizes=c(2,2))
noext <- blockrand(n=100, id.prefix='N', block.prefix='B',stratum='No Ext.', block.sizes=c(2,2))

go <- eventReactive(input$send, {

  list(id=input$identif, tit=input$titulo, ex=input$tipo)

})

block_random = function(tip) {

  if (dim(upda$asg)[1]>0) {

    X = subset(upda$asg, strat==tip)

    x = dim(X)[1]

  } else x = 0

  if (tip=="Yes") {

    g = ext$treatment[x+1]

  } else if (tip=="No") {

    g = noext$treatment[x+1]

  } else return(-1) # Error

  ifelse(g=='A', 0, 1)

}

observeEvent(input$send, {

  Q = go()

  if (is.null(Q) | is.void(Q)) {

    shinyalert(title="Please fill in the input.", type="error",
showConfirmButton=TRUE, confirmButtonText="OK", timer=0)

    return()

  }

  id = Q$id

  check.id = grep("^bmjopen-201[89]-[0-9]{6}$", id)

  if (length(check.id) == 0) {

    shinyalert(title="Wrong ID.", text="Please enter a valid BMJ code.",
type="error", showConfirmButton=TRUE, confirmButtonText="OK", timer=0)

    return()

  }

}

```

```

#File 2 (continuation)

id = Q$Id

      check.id = grep("^bmjopen-201[89]-[0-9]{6}$", id)

      if (length(check.id) == 0) {

        shinyalert(title="Wrong ID.", text="Please enter a valid BMJ code.",
type="error", showConfirmButton=TRUE, confirmButtonText="OK", timer=0)

        return()

      }

      if (Q$ex=="") {

        shinyalert(title="Empty field:", text="extension of CONSORT?", type="error",
showConfirmButton=TRUE, confirmButtonText="OK", timer=0)

        return()

      }

      if (Q$tit=="") {

        shinyalert(title="Empty field:", text="please provide a title.", type="error",
showConfirmButton=TRUE, confirmButtonText="OK", timer=0)

        return()

      }

      n = dim(upda$asg)[1]

      if (n>0) {

        I = which(upda$asg$Id==id)

        if (length(I)>0) {

          shinyalert(title="Invalid ID:", text="this ID has been already
assigned.", type="error", showConfirmButton=TRUE, confirmButtonText="OK", timer=0)

          return()

        }

      }

      txt = paste("Go on with the manuscript '<i>", Q$tit, "</i>', with ID <b>", Q$Id, "</b>', which
<b>", ifelse(Q$ex=="Yes", 'corresponds', 'does not correspond'), "</b> to an extension of CONSORT:", sep=")

      shinyalert(title='Confirm inclusion', text=txt, closeOnEsc=TRUE,
closeOnClickOutside=FALSE, html=TRUE, type="warning", showConfirmButton=TRUE,
showCancelButton=TRUE, confirmButtonText="Right, go on", cancelButtonText="NO, stop", timer=0,
imageUrl="", callbackR = Success)

    })

    Success = function(x) if (x != FALSE) {

      Q = go()

      g = block_random(Q$ex)

      if (g == -1) return

      L = list(id=Q$Id, title=Q$tit, strat=Q$ex, group=g, date=date())

      upda$asg = rbind(upda$asg, as.data.frame(L))

      write.table(upda$asg, archi, sep='\t', row.names=FALSE)

```

```

#File 2 (continuation)

filename = tempfile()

interv = ifelse(g==0, "CONTROL (0)", "INTERVENTION (1)")

cat(sprintf("Manuscript ID: %s\nTitle: %s\nExtension of CONSORT: %s\nAssigned to:
%s\n",

          Q$Id, Q$tit, Q$ex, interv), file=filename)

# preparar y mandar mensaje
dest = 'david.blanco@hotmail.com'

Msg = tempfile()

comm = paste('echo "To:', dest, '\nFrom: jose.a.gonzalez@upc.edu\nSubject: A
manuscript has been assigned\n"| (cat -, filename, ') >', Msg)

system(comm)

system(paste("ssmtp", dest, "<", Msg))

updateTextInput(session, "identif", "Please enter the manuscript ID:", value="")

updateTextAreaInput(session, "titulo", "Please enter the manuscript title, or at least its
first words:", value="")

updateSelectInput(session, "tipo", "Does it correspond to an extension of CONSORT?",
choices=c("", "Yes", "No"))
}

observeEvent(input$borrar, {
  shinyalert(title='Are you sure?', text="This action will remove the assignments.",
closeOnEsc=TRUE, closeOnClickOutside=FALSE, html=TRUE, type="warning", showConfirmButton=TRUE,
showCancelButton=TRUE, confirmButtonText="Yes, remove them", cancelButtonText="NO, don't reset",
timer=0, imageUrl="", animation=TRUE, callbackR = function(x) { if(x != FALSE) { upda$asg = data.frame();
file.remove(archi) } })
})

output$asig = renderTable( {

  upda$asg

})

})

```

**Script C: Primary outcome analysis**

```
# Loading the data

data <- read.csv2('Scores.txt', header = TRUE, sep = '')

data2 <- subset(data, data$Imputation==0)

# Fitting a linear model and calculating CIs with imputation

model1 <- lm(data$Final ~ data$Baseline + data$Group)

summary(model1)

na <- 12

nb <- 12

nboot <- 10000

set.seed(111111)

diff.mean1 <- c()

for (k in 1:nboot){

  sel <- sample(1:(na + nb), na + nb, rep=TRUE) # selected articles

  reporting.boot <- data[sel, ]

  diff.mean1[k] <- coefficients(lm(reporting.boot$Final ~ reporting.boot$Group
+ reporting.boot$Baseline, reporting.boot))[2]

}

conf.int1 <- quantile(diff.mean1, c(0.025, 0.975), na.rm = TRUE)

# Fitting a linear model and calculating CIs without imputation

model2 <- lm(data2$Final ~ data2$Baseline + data2$Group)

summary(model2)

na <- 9

nb <- 9

set.seed(222222)

diff.mean2 <- c()

for (k in 1:nboot){

  sel <- sample(1:(na + nb), na + nb, rep = TRUE) # selected articles

  reporting.boot <- data2[sel, ]

  diff.mean2[k] <- coefficients(lm(reporting.boot$Final ~ reporting.boot$Group
+ reporting.boot$Baseline, reporting.boot))[2]

}

conf.int2 <- quantile(diff.mean2, c(0.025, 0.975), na.rm = TRUE)
```
